# Supplementary material for: Sodium glucose cotransporter 2 inhibitors and risk of serious adverse events: nationwide register based cohort study
Source: PubMed Central journal article supplement — BMJ. 2018 Nov 14;363:k4365. doi: 10.1136/bmj.k4365 (PMC6233755; doi:10.1136/bmj.k4365), 2018-11-14
Supplement: uedp045509.ww1.pdf [file uedp045509.ww1.pdf]

## SUPPLEMENTARY MATERIAL

|                                                                                                                                                                                                                                                                                                                                                               |    |
|---------------------------------------------------------------------------------------------------------------------------------------------------------------------------------------------------------------------------------------------------------------------------------------------------------------------------------------------------------------|----|
| <b>Sources of data</b> .....                                                                                                                                                                                                                                                                                                                                  | 2  |
| <b>Supplementary Table 1:</b> ICD10 and procedure codes for exclusion criteria .....                                                                                                                                                                                                                                                                          | 3  |
| <b>Supplementary Table 2:</b> ATC codes and estimated days of exposure per unit of SGLT2 inhibitors and GLP1-receptor-agonists.....                                                                                                                                                                                                                           | 4  |
| <b>Supplementary Table 3:</b> Propensity score variables and definitions .....                                                                                                                                                                                                                                                                                | 5  |
| <b>Supplementary Table 4:</b> Outcome definitions for primary and additional outcomes .....                                                                                                                                                                                                                                                                   | 9  |
| <b>Supplementary Table 5:</b> Validation studies for diagnostic codes and procedure codes in the national patient registers of Sweden and Denmark .....                                                                                                                                                                                                       | 10 |
| <b>Supplementary Table 6:</b> ICD10 and procedure codes used to define history of major cardiovascular disease .....                                                                                                                                                                                                                                          | 13 |
| <b>Supplementary Table 7:</b> ICD10 and procedure codes used to define history of lower limb amputation and peripheral artery disease for subgroup analysis .....                                                                                                                                                                                             | 14 |
| <b>Supplementary Table 8:</b> Variable definitions for the analyses using data from the National Diabetes Register in Sweden.....                                                                                                                                                                                                                             | 15 |
| <b>Supplementary Table 9:</b> Baseline characteristics of SGLT2 inhibitor users and GLP1-receptor-agonist users before and after propensity score matching in Sweden .....                                                                                                                                                                                    | 16 |
| <b>Supplementary Table 10:</b> Baseline characteristics of SGLT2 inhibitor users and GLP1-receptor-agonist users before and after propensity score matching in Denmark.....                                                                                                                                                                                   | 19 |
| <b>Supplementary Table 11:</b> Median (interquartile range) follow-up time for primary outcomes.....                                                                                                                                                                                                                                                          | 22 |
| <b>Supplementary Table 12:</b> Association between use of SGLT2 inhibitors vs. GLP1-receptor-agonists and risk of additional outcomes.....                                                                                                                                                                                                                    | 23 |
| <b>Supplementary Table 13</b> P-values for homogeneity of associations in subgroup analyses.....                                                                                                                                                                                                                                                              | 24 |
| <b>Supplementary Table 14:</b> Association between use of SGLT2 inhibitors vs. GLP1-receptor-agonists and risk of diabetic ketoacidosis, and acute kidney injury in additional analyses with follow-up time limited to 6 months after treatment initiation .....                                                                                              | 25 |
| <b>Supplementary Table 15:</b> Distribution of variables from the National Diabetes Register in Sweden among SGLT2 inhibitor users and GLP1-receptor-agonist users, before and after propensity-score-matching .....                                                                                                                                          | 26 |
| <b>Supplementary Table 16:</b> Hazard ratios (95% CI) for use of SGLT2 inhibitors vs GLP1-receptor-agonists for each imputation in the analysis in the propensity-score-matched cohort in Sweden, adjusting for glycated hemoglobin level, blood pressure, eGFR, albuminuria, body-mass index and smoking, using multiple imputation for missing values ..... | 27 |
| <b>Supplementary Figure 1:</b> Cumulative incidence of primary outcome serious adverse events .....                                                                                                                                                                                                                                                           | 28 |
| <b>References</b> .....                                                                                                                                                                                                                                                                                                                                       | 29 |

## Sources of Data

We used data on filled prescriptions from the national prescription registers in Sweden<sup>1</sup> and Denmark<sup>2</sup>. These registers hold individual-level information on all drug prescriptions filled at all pharmacies in the country since July, 2005, in Sweden, and 1995 in Denmark. The registers include information on the anatomical therapeutic chemical (ATC) code of the dispensed drug, the amount of drug dispensed, and the date when the prescription was filled.

The national patient register in each of the countries contain individual-level information on outpatient and emergency department visits and inpatient admissions to all hospitals.<sup>3,4</sup> We used physician-assigned procedure codes, and diagnoses according to the International Classification of Diseases, tenth revision (ICD10), to obtain information about history of disease at cohort entry for each patient and the outcome events during the study period.

We used each country's population registers to obtain information on age, sex, country of birth, migration status, and vital status of the patients included in the study.<sup>5,6</sup> From Statistics Denmark and Statistics Sweden<sup>5</sup> we obtained data on patients' educational level and civil status.

The National Diabetes Register includes information on risk factors in patients with type 1 or type 2 diabetes in Sweden. The information is collected by trained nurses and physicians during patient visits to outpatient and primary care clinics nationwide. The number of patients included in the register has increased over time; at present, more than 90% of all patients with drug-treated diabetes in Sweden are included.<sup>7</sup> From this register, we obtained data on glycated hemoglobin, blood pressure, albuminuria, estimated glomerular filtration rate (eGFR), body-mass index and smoking for patients residing in Sweden.

By the use of the personal identification number assigned to all inhabitants in the two countries, we linked individual-level information between these sources of data.

**Supplementary Table 1:** ICD10 and procedure codes for exclusion criteria.

| <b>Category</b>                                                                                                                                                                                                                                                          | <b>Codes</b>                                                                                                             |
|--------------------------------------------------------------------------------------------------------------------------------------------------------------------------------------------------------------------------------------------------------------------------|--------------------------------------------------------------------------------------------------------------------------|
| No hospital contact or prescription drug during one year prior to cohort entry                                                                                                                                                                                           |                                                                                                                          |
| Dialysis or renal transplantation before cohort entry <sup>a</sup>                                                                                                                                                                                                       | <i>ICD10:</i> Z49, Z940, Z992<br><i>Procedure code:</i> KAS                                                              |
| End stage illness (severe malnutrition, cachexia, dementia, coma) before cohort entry <sup>a</sup>                                                                                                                                                                       | <i>ICD10:</i> E40, E41, E42, E43, R402, R64 F00-03, G30<br><i>ATC-code:</i> N06D                                         |
| Drug misuse within one year before cohort entry                                                                                                                                                                                                                          | <i>ICD10:</i> F11, F12, F13, F14, F15, F16, F18, F19, R781, R782, R783, R784, R785, T40<br><i>ATC-code:</i> N07BB, N07BC |
| Severe pancreatic disorder (chronic pancreatitis [defined by pancreatic enzyme substitution prescription within the past year or diagnosis at any time before cohort entry <sup>a</sup> ], pancreatic cancer, major pancreatic surgery) before cohort entry <sup>a</sup> | <i>ICD10:</i> C25, K860, K861<br><i>ATC-code:</i> A09AA02 (within the past year)<br><i>Procedure code:</i> JLC, JLE      |
| Liraglutide with obesity indication (Saxenda) before cohort entry <sup>b</sup>                                                                                                                                                                                           | <i>ATC-code:</i> A10BJ02 with product number 131577 or 395175 in Denmark and 513490 in Sweden.                           |
| Any hospitalization within 30 days before cohort entry                                                                                                                                                                                                                   |                                                                                                                          |

<sup>a</sup> 10-year look-back

<sup>b</sup> Ever use during time period that the drug has been available

**Supplementary Table 2:** ATC codes and estimated days of exposure per unit of SGLT2 inhibitors and GLP1-receptor-agonists.

|         | ATC definition and estimated days of supply                                                                                                                           |                                                                                                                                                                                |
|---------|-----------------------------------------------------------------------------------------------------------------------------------------------------------------------|--------------------------------------------------------------------------------------------------------------------------------------------------------------------------------|
|         | <b>SGLT2 inhibitors</b>                                                                                                                                               | <b>GLP1-receptor-agonists</b>                                                                                                                                                  |
| Sweden  | All units are days per tablet<br>A10BK01 = 1.0<br>A10BK02 = 1.0<br>A10BK03 = 1.0<br>A10BD15 = 0.5<br>A10BD16 = 0.5<br>A10BD19 = 1.0<br>A10BD20 = 0.5<br>A10BD21 = 1.0 | A10BJ01 (5 or 10 microgram): 0.5 per dose<br>A10BJ01 (2 mg): 7.0 per dose<br>A10BJ02: 5.0 per ml<br>A10BJ03: 1.0 per dose<br>A10BJ05: 7.0 per dose<br>A10AE56: 3.0 per ml      |
| Denmark | As in Sweden                                                                                                                                                          | A10BJ01 (5 or 10 microgram): 0.5 per dose<br>A10BJ01 (2 mg): 7.0 per dose<br>A10BJ02: 15.0 per pen<br>A10BJ03: 14.0 per pen<br>A10BJ05: 7.0 per dose<br>A10AE56: not available |

**Supplementary Table 3:** Propensity score variables and definitions.

| <b>Sociodemographic characteristics</b>                           | <i>Categories</i>                                                                                        |
|-------------------------------------------------------------------|----------------------------------------------------------------------------------------------------------|
| Sex                                                               | Women; Men                                                                                               |
| Age                                                               | Cubic splines                                                                                            |
| Place of birth                                                    | Scandinavia; Rest of Europe; Outside Europe; Missing                                                     |
| Education                                                         | Primary school or high school; Vocational or short tertiary education; Medium or long tertiary education |
| Married/living with partner <sup>a</sup>                          | Yes; No                                                                                                  |
| <b>Comorbidities</b> (10 yr look-back unless otherwise specified) | <i>ICD-10 codes and procedure codes</i>                                                                  |
| <i>Cardiovascular</i>                                             |                                                                                                          |
| Acute coronary syndrome                                           | I200, I21-22                                                                                             |
| Other ischemic heart disease                                      | I11 (excl I110), I20 (excl I200), I24, I25                                                               |
| Heart failure/cardiomyopathy                                      | I50, I110, I130, I132, I42, I43, J81                                                                     |
| Valve disorders                                                   | I34-I37                                                                                                  |
| Stroke                                                            | I60-I64                                                                                                  |
| Other cerebrovascular disease                                     | I65-I69, G45 (excl G454), G46                                                                            |
| Atrial fibrillation                                               | I48                                                                                                      |
| Other arrhythmia                                                  | I44-I47, I49                                                                                             |
| Coronary revascularization in the past yr                         | Procedure code: FNA, FNB, FNC, FND, FNE, FNG                                                             |
| Other cardiac surgery/invasive cardiac procedure in the past yr   | Procedure code F (except FNA, FNB, FNC, FND, FNE, FNG), DF020                                            |
| <i>Other organs and psychiatric</i>                               |                                                                                                          |
| COPD                                                              | J44                                                                                                      |
| Other lung disease                                                | I27, J84, R092, E662, Z99, J40-J43, J45-J47, J60-70, J92, J96, J982, J983; surgery code GBB              |
| Venous thromboembolism                                            | I26, I80 (excl I80.0), I81, I820, I822-I829                                                              |
| Cancer (excl non-melanoma skin cancer)                            | C00-C43, C45-C97                                                                                         |
| Liver disease                                                     | B18, I850, I859, I982, K70-K77                                                                           |
| Rheumatic disease                                                 | M05-M09, M30-34, M351, M353, M45                                                                         |
| Psychiatric disorder                                              | F04-F10, F20-F99                                                                                         |

|                                                                |                                                                                                                                                                                                                                                                                                                                                                           |
|----------------------------------------------------------------|---------------------------------------------------------------------------------------------------------------------------------------------------------------------------------------------------------------------------------------------------------------------------------------------------------------------------------------------------------------------------|
| Fracture in the past year                                      | S02 (excl S025), S12, S22, S32, S42, S52, S62, S72, S82, S92, T02, T08, T10, T12, M484, M485, M843                                                                                                                                                                                                                                                                        |
| Acute pancreatitis                                             | K85                                                                                                                                                                                                                                                                                                                                                                       |
| Serious urinary tract infection                                | N109, N300, N309, N390<br>Primary diagnosis / admission, or secondary diagnosis / admission if sepsis code is primary (both countries: A40, A41; Sweden, also: R650, R651)                                                                                                                                                                                                |
| <i>Diabetes and kidney related comorbidity</i>                 |                                                                                                                                                                                                                                                                                                                                                                           |
| Lower limb amputations                                         | Procedure code: NFQ, NGQ, NHQ                                                                                                                                                                                                                                                                                                                                             |
| Arterial disease                                               | I65, I70, I72, I73, I74, I77, K550, K551, E115, E145, E135                                                                                                                                                                                                                                                                                                                |
| Renal disease                                                  | E112, I12, I13, N00-08, N17, N18, N19, N25-N27, E132, E142                                                                                                                                                                                                                                                                                                                |
| Obesity <sup>b</sup>                                           | E66                                                                                                                                                                                                                                                                                                                                                                       |
| Diabetic eye complications                                     | E113, E133, E143, H280, H358, H360<br>Procedure code: CKC10, CKC12, CKC15, CKD65                                                                                                                                                                                                                                                                                          |
| Diabetic ketoacidosis                                          | Sweden: E110A, E111A<br>Denmark: E111, E131, E141                                                                                                                                                                                                                                                                                                                         |
| Diabetes, other complications                                  | Sweden: E110 (excl E110A), E111 (excl E111A), E130, E131, E140, E141, E160, E161, E162, E116, E117, E118, G990, G590, G632, E114, E134, E136, E137, E138, E144, E146, E147, E148, M142, M146, M908, L984<br>Denmark: E110, E130, E140, E160, E161, E162, E116, E117, E118, G990, G590, G632, E114, E134, E136, E137, E138, E144, E146, E147, E148, M142, M146, M908, L984 |
| <b>Hospitalizations and outpatient visits in the past year</b> |                                                                                                                                                                                                                                                                                                                                                                           |
| Hospitalization due to cardiovascular causes                   | I00-99                                                                                                                                                                                                                                                                                                                                                                    |
| Hospitalization due to type 2 diabetes                         | E11                                                                                                                                                                                                                                                                                                                                                                       |
| Hospitalization due to other causes                            |                                                                                                                                                                                                                                                                                                                                                                           |
| Outpatient contact due to cardiovascular causes                | I00-99                                                                                                                                                                                                                                                                                                                                                                    |
| Outpatient contact due to type 2 diabetes                      | E11                                                                                                                                                                                                                                                                                                                                                                       |
| Outpatient contact due to other causes                         |                                                                                                                                                                                                                                                                                                                                                                           |
| <b>Diabetes drugs in past 6 months</b>                         |                                                                                                                                                                                                                                                                                                                                                                           |

|                                                      |                                                                                                                     |
|------------------------------------------------------|---------------------------------------------------------------------------------------------------------------------|
| Metformin                                            | A10BA02, A10BD02, A10BD03, A10BD05, A10BD07, A10BD08, A10BD10, A10BD11, A10BD13, A10BD14, A10BD15, A10BD16, A10BD20 |
| Sulfonylureas                                        | A10BB, A10BD01, A10BD02, A10BD04, A10BD06                                                                           |
| DPP4 inhibitors                                      | A10BH, A10BD07, A10BD08, A10BD09, A10BD10, A10BD11, A10BD13, A10BD19, A10BD21                                       |
| Insulin, fast-acting                                 | A10AB, A10AD                                                                                                        |
| Insulin, intermediate- and long-acting               | A10AC, A10AD, A10AE                                                                                                 |
| Other antidiabetics (glitazones, glinides, acarbose) | A10BF01, A10BG, A10BD03, A10BD04, A10BD05, A10BD06, A10BD09, A10BD14, A10BX                                         |
| No diabetes drug                                     | Not any A10                                                                                                         |
| <b>Time since first diabetes drug</b>                | A10: <1 year, 1-2 years, 3-4 years, 5-6 years, ≥7 years                                                             |
| <b>Other drugs in the past year</b>                  | <i>ATC code</i>                                                                                                     |
| ACE-inhibitor or ARB                                 | C09A-D                                                                                                              |
| Calcium channel blocker                              | C08C, C08D                                                                                                          |
| Loop diuretic                                        | C03C, C03EB                                                                                                         |
| Other diuretic                                       | C03A, C03B, C03D, C03EA                                                                                             |
| Beta-blocker                                         | C07                                                                                                                 |
| Digoxin                                              | C01AA05                                                                                                             |
| Nitrates                                             | C01DA                                                                                                               |
| Platelet inhibitor                                   | B01AC                                                                                                               |
| Anticoagulant                                        | B01AA, B01AE07, B01AF, B01AX05                                                                                      |
| Lipid lowering drug                                  | C10                                                                                                                 |
| Antidepressant                                       | N06A                                                                                                                |
| Antipsychotic                                        | N05A                                                                                                                |
| Anxiolytic, hypnotic or sedative                     | N05B, N05C                                                                                                          |
| Beta-2 agonist inhalant                              | R03AC                                                                                                               |
| Anticholinergic inhalant                             | R03BB                                                                                                               |
| Glucocorticoid inhalant                              | R03BA, R03AK                                                                                                        |
| Oral glucocorticoid                                  | H02AB                                                                                                               |
| NSAID                                                | M01A                                                                                                                |
| Opiate                                               | N02A                                                                                                                |
| <b>Number of drugs used in the past yr</b>           | 0-4, 5-9, 10-14, ≥15                                                                                                |

Abbreviations: ACE-I, angiotensin converting enzyme inhibitor; ARB, angiotensin receptor blocker; COPD, chronic obstructive pulmonary disease; DDP4, dipeptidyl peptidase 4; NSAID, non-steroidal anti-inflammatory drug; SD, standard deviation.

<sup>a</sup> Including married or living with partner in Denmark and married in Sweden.

<sup>b</sup> Diagnosis of obesity in secondary care.



**Supplementary Table 4:** Outcome definitions for primary and additional outcomes.

| <b>Outcome</b>                                                         | <b>ICD10 or procedure code</b>                                                                     | <b>Type of diagnosis (primary, secondary) / type of hospital contact</b>                                                           |
|------------------------------------------------------------------------|----------------------------------------------------------------------------------------------------|------------------------------------------------------------------------------------------------------------------------------------|
| Lower limb amputation (hip to toe level)                               | <i>Procedure codes:</i><br>NFQ09, NFQ19, NFQ99, NGQ09, NGQ19, NGQ99, NHQ0, NHQ1, NHQ99             | NA / inpatient or outpatient surgery                                                                                               |
| Bone fracture                                                          | S02 (excl S025), S12, S22, S32, S42, S52, S62, S72, S82, S92, T02, T08, T10, T12, M484, M485, M843 | Any / admission or emergency department visit                                                                                      |
| Diabetic ketoacidosis                                                  | <i>Sweden:</i> E110A, E111A<br><i>Denmark:</i> E111, 131, E141                                     | Any / admission                                                                                                                    |
| Acute kidney injury                                                    | N17                                                                                                | Any / admission                                                                                                                    |
| Serious urinary tract infection                                        | N109, N300, N309, N390                                                                             | Primary / admission or secondary / admission if sepsis code (both countries: A40, A41; Sweden, also: R650, R651) is primary        |
| Venous thromboembolism                                                 | I26, I80 (excl I80.0), I81, I820, I822-I829                                                        | Any / admission or emergency department visit                                                                                      |
| Acute pancreatitis                                                     | K85                                                                                                | Any / admission                                                                                                                    |
| Toe or metatarsal amputation                                           | <i>Procedure codes:</i><br>NHQ03, NHQ05, NHQ07, NHQ13, NHQ14, NHQ16, NHQ17                         | NA / inpatient or outpatient surgery                                                                                               |
| Major osteoporotic fractures (hip, spine, proximal humerus or forearm) | S720-S722, S120-S127, S129, S220-S221, S320, S327, M484, M485, S422-S423, S52                      | Any / admission or emergency department visit                                                                                      |
| Pyelonephritis or urosepsis                                            | N109, N300, N309, N390                                                                             | Primary / admission (N109) or secondary / admission if sepsis code (both countries: A40, A41; Sweden, also: R650, R651) is primary |

**Supplementary Table 5** Validation studies for diagnostic codes and procedure codes in the national patient registers of Sweden and Denmark.

| <b>Outcome</b><br>(ICD 10 codes/procedure codes)                                                                                                                               | <b>Reference</b>                                   | <b>Country (years)</b> | <b>Type of diagnoses</b>                | <b>Comment</b>                                                                                                                                                                                                                                                                                                                                                                                                                                                                                                                                                                                                                                                      | <b>Correct diagnoses in the national patient registers (PPV) %</b> |
|--------------------------------------------------------------------------------------------------------------------------------------------------------------------------------|----------------------------------------------------|------------------------|-----------------------------------------|---------------------------------------------------------------------------------------------------------------------------------------------------------------------------------------------------------------------------------------------------------------------------------------------------------------------------------------------------------------------------------------------------------------------------------------------------------------------------------------------------------------------------------------------------------------------------------------------------------------------------------------------------------------------|--------------------------------------------------------------------|
| Leg and arm amputations (NR)                                                                                                                                                   | Malmstedt <sup>23</sup>                            | Sweden (NR)            | NA                                      | Validation against medical records. Personal communication to Ludvigsson et al. <sup>23</sup>                                                                                                                                                                                                                                                                                                                                                                                                                                                                                                                                                                       | 610/624=98.4%                                                      |
| Minor and major amputations (Procedure codes: NHQ02-08, NHQ12-19, NHQ90-98; NEQ, NEQ19, NEQ99, NFQ, NFQ09, NFQ19, NFQ99, NGQ, NGQ09, NGQ19, NGQ99, NHQ00, NHQ01, NHQ10, NHQ11) | Bruun <sup>25</sup>                                | Denmark (1989-2006)    | NA                                      | Analysis of 1381 patients with diabetes included in a cohort study. At 6 and 14 years of follow-up, the general practitioners of the participants indicated in a questionnaire whether amputations had been carried out. All events reported by the general practitioners were recorded in the National Patient Register, and all amputations in the study population recorded in the National Patient Register were also reported by the general practitioner. N=63 events at 19 years of follow-up including events between year 14-19 of follow-up only identified from the National Patient Register. N events at 6 or 14 years of follow-up were not reported. | 100%                                                               |
| Hip fracture (NR)                                                                                                                                                              | National Board of Health and Welfare <sup>31</sup> | Sweden (2009)          | NR                                      | 15,920 cases in the Swedish Hip Fracture Register were compared with registration in the National Patient Register. The proportion of cases identified in the National Patient Register was 95.3%.                                                                                                                                                                                                                                                                                                                                                                                                                                                                  | NA                                                                 |
| Hip fracture (NR)                                                                                                                                                              | Nilsson <sup>32</sup>                              | Sweden (1994)          | Primary diagnoses. Hospital admissions. | Validation against medical records.                                                                                                                                                                                                                                                                                                                                                                                                                                                                                                                                                                                                                                 | 21/22 = 95%                                                        |

|                                                                                                                                                                                                                                                                         |                               |                     |                                                                                      |                                                                                                                                         |                                                                                             |
|-------------------------------------------------------------------------------------------------------------------------------------------------------------------------------------------------------------------------------------------------------------------------|-------------------------------|---------------------|--------------------------------------------------------------------------------------|-----------------------------------------------------------------------------------------------------------------------------------------|---------------------------------------------------------------------------------------------|
| Hip fracture (NR)                                                                                                                                                                                                                                                       | Michaelsson <sup>3</sup><br>3 | Sweden (1993-1995)  | NR                                                                                   | Women aged 50-81 years. Cases identified through procedure codes and diagnostic codes. Validated against medical records.               | 2556/2597=98.4%                                                                             |
| Venous thromboembolism (ICD10: I801-I803, I26)                                                                                                                                                                                                                          | Sundbøll <sup>24</sup>        | Denmark (2010-2012) | Position NR. Hospital admission and outpatient visits.                               | Validation against medical records at 1 university hospital and 2 regional hospitals.                                                   | First time venous thromboembolism: 87/99=88%<br>Recurrent venous thromboembolism: 67/93=72% |
| Venous thromboembolism (ICD-8: 450.99, 451.00, 451.08, 451.09, 451.99 and ICD-10: I26, I80.1-80.9)                                                                                                                                                                      | Severinsen <sup>34</sup>      | Denmark (1994-2006) | Primary and secondary position. Hospital admissions and emergency department visits. | First time venous thromboembolism among participants in the cohort study "Diet, Cancer, and Health". Validated against medical records. | 643/1100 = 58.5%                                                                            |
| Urinary infection (ICD10: N300, N308, N309, N10)                                                                                                                                                                                                                        | Ingeman <sup>35</sup>         | Denmark (2003-2006) | Primary and secondary position. Hospital admissions.                                 | Study of stroke patients. Validation against medical records.                                                                           | 30/39 = 76.9%                                                                               |
| Infection (ICD8: 000-001,004-006, 008-009, 070, 137, 320, 110-112, 114-117, 040-061, 075, 079, 480-486, 036.1, 038, 680-686, 010-018, 590, 595, ICD10: A00-A01, A03-A04, A06-A09; B15-B19, B20-B24, A39.0, G00-G03, B35-B49 B00-B09, B25- B34, B50-B64, A48.1, J12-J18, | Benfield <sup>36</sup>        | Denmark (1993-2000) | Primary and secondary position. Hospital admissions.                                 | Admissions to 1 hospital. Validation against medical records.                                                                           | 139/141 = 99%                                                                               |

|                                                                         |                        |                                        |                                                                    |                                                                                                                                                                                       |                 |
|-------------------------------------------------------------------------|------------------------|----------------------------------------|--------------------------------------------------------------------|---------------------------------------------------------------------------------------------------------------------------------------------------------------------------------------|-----------------|
| A32.7, A39.2-4, A40-41, A48.3, A46, L00-L08, A15-A19, B90, N10-12, N30) |                        |                                        |                                                                    |                                                                                                                                                                                       |                 |
| Acute pancreatitis (ICD10: K859)                                        | Munch <sup>37</sup>    | Sweden, Denmark and Norway (2005-2014) | Primary. Hospital admissions.                                      | Women ≥55 years of age with osteoporosis. Validation against medical records.                                                                                                         | 113/129 = 87.6% |
| Acute pancreatitis (ICD10: K859)                                        | Razavi <sup>38</sup>   | Sweden (1998 and 2007)                 | Primary (1998), primary and secondary (2007). Hospital admissions. | Random sample of patients with a diagnosis in the National Patient Register. Validation against medical records.                                                                      | 522/530 = 98%   |
| Acute pancreatitis (ICD 8: 577.00-577.09; ICD10: K859)                  | Floyd <sup>39</sup>    | Denmark (1981-2000)                    | Primary and secondary. Hospital admissions.                        | Random sample of 99 medical records with a diagnosis in the National Patient Register (1981-2000) and 90 women with a diagnosis in 1997 or 1999). Validation against medical records. | 163/189 = 86%   |
| Acute pancreatitis (NR)                                                 | Lindblad <sup>23</sup> | Sweden (NR)                            | NR                                                                 | Validation against medical records. Personal communication to Ludvigsson et al. <sup>23</sup>                                                                                         | 695/602 = 98.8% |

Abbreviations: PPV: positive predictive value; NR: not reported; NA: not applicable.

**Supplementary Table 6:** ICD10 and procedure codes used to define history of major cardiovascular disease.

| <b>Diagnosis</b>                                                                                                                     | <b>ICD10/procedure code</b>                                                                                                                                            |
|--------------------------------------------------------------------------------------------------------------------------------------|------------------------------------------------------------------------------------------------------------------------------------------------------------------------|
| Major cardiovascular disease (coronary revascularization, acute coronary syndrome, stroke, heart failure, peripheral artery disease) | Procedure code:<br>FNA, FNB, FNC, FND, FNE, FNG<br><br>ICD10:<br>I200, I21-22, I60-I64, I110, I130, I132, I50, J81, I65, I70, I72, I73.9, K550, K551, E115, E135, E145 |

**Supplementary Table 7:** ICD10 and procedure codes used to define history of lower limb amputation and peripheral artery disease for subgroup analysis.

| <b>Diagnosis</b>                                    | <b>ICD10/procedure code</b>                                            |
|-----------------------------------------------------|------------------------------------------------------------------------|
| Lower limb amputation and peripheral artery disease | Procedure code: NFQ, NGQ, NHQ<br>ICD10: E115, E135, E145, I70.2, I73.9 |

**Supplementary Table 8:** Variable definitions for the analyses using data from the National Diabetes Register in Sweden.

| <b>Variable</b>                      | <b>Categorization</b>                                                                                                                                                                             | <b>Missing values (%)<sup>a</sup></b> |
|--------------------------------------|---------------------------------------------------------------------------------------------------------------------------------------------------------------------------------------------------|---------------------------------------|
| HbA1c (%)                            | ≤ 6.9; 7.0-7.8; 7.9-8.7; 8.8-9.6; ≥9.7                                                                                                                                                            | 40                                    |
| Blood pressure                       | <i>Normotension:</i> SBP <140 mmHg AND DBP <90 mmHg<br><i>Stage 1 hypertension:</i> SBP ≥140 to <160 mmHg OR DBP: ≥90 to <100mmHg<br><i>Stage 2 hypertension:</i> SBP ≥160 mmHg OR DBP: ≥100 mmHg | 20                                    |
| Albuminuria                          | Normalalbuminuria; microalbuminuria; macroalbuminuria                                                                                                                                             | 38                                    |
| eGFR (ml/min)                        | ≥90; ≥60 to <90; <60                                                                                                                                                                              | 25                                    |
| Body-mass index (kg/m <sup>2</sup> ) | <i>Normal weight:</i> <25<br><i>Overweight:</i> ≥25 to <30<br><i>Obese class I:</i> ≥30 to <35<br><i>Obese class I/II:</i> ≥35                                                                    | 26                                    |
| Current smoking                      | Yes/no                                                                                                                                                                                            | 28                                    |

Abbreviations: SBP: systolic blood pressure; DBP: diastolic blood pressure; eGFR: estimated glomerular filtration rate.

<sup>a</sup> Missing values in the propensity-score-matched cohort of SGLT2 inhibitor users and GLP1-receptor-agonist users in Sweden as shown in Supplementary Tables 9 and 15

**Supplementary Table 9:** Baseline characteristics of SGLT2 inhibitor users and GLP1-receptor-agonist users before and after propensity score matching in Sweden. Numbers are shown in n (%) unless otherwise indicated.

|                                                           | Before propensity-score-matching |                                      | After propensity-score-matching |                                      |
|-----------------------------------------------------------|----------------------------------|--------------------------------------|---------------------------------|--------------------------------------|
|                                                           | SGLT2 inhibitors<br>(N=11,891)   | GLP1-receptor-agonists<br>(N=17,783) | SGLT2 inhibitors<br>(N=10,512)  | GLP1-receptor-agonists<br>(N=10,512) |
| Male sex                                                  | 7,533 (63)                       | 10,287 (58)                          | 6,493 (62)                      | 6,480 (62)                           |
| Mean age (SD), yrs.                                       | 63 (10)                          | 61 (10)                              | 62 (10)                         | 62 (10)                              |
| <b>Place of birth</b>                                     |                                  |                                      |                                 |                                      |
| Scandinavia                                               | 9,728 (82)                       | 15,219 (86)                          | 8,792 (84)                      | 8,760 (83)                           |
| Rest of Europe                                            | 995 (8)                          | 1,150 (6)                            | 780 (7)                         | 777 (7)                              |
| Outside Europe                                            | 1,166 (10)                       | 1,413 (8)                            | 940 (9)                         | 974 (9)                              |
| Missing                                                   | 2 (<1)                           | 1 (<1)                               | 0 (0)                           | 1 (<1)                               |
| <b>Civil status</b>                                       |                                  |                                      |                                 |                                      |
| Married                                                   | 6,183 (52)                       | 8,995 (51)                           | 5,441 (52)                      | 5,435 (52)                           |
| Single                                                    | 5,683 (48)                       | 8,765 (49)                           | 5,051 (48)                      | 5,056 (48)                           |
| Missing                                                   | 25 (<1)                          | 23 (<1)                              | 20 (<1)                         | 21 (<1)                              |
| <b>Education</b>                                          |                                  |                                      |                                 |                                      |
| Primary-/secondary school/vocational training             | 9,277 (78)                       | 13,733 (77)                          | 8,181 (78)                      | 8,165 (78)                           |
| Short tertiary education                                  | 1,158 (10)                       | 1,861 (10)                           | 1,040 (10)                      | 1,074 (10)                           |
| Medium or long tertiary education                         | 1,284 (11)                       | 2,001 (11)                           | 1,158 (11)                      | 1,138 (11)                           |
| Missing                                                   | 172 (1)                          | 188 (1)                              | 133 (1)                         | 135 (1)                              |
| <b>Year of cohort entry<sup>a</sup></b>                   |                                  |                                      |                                 |                                      |
| 2013                                                      | 506 (4)                          | 1,585 (9)                            | 463 (4)                         | 884 (8)                              |
| 2014                                                      | 2,094 (18)                       | 3,903 (22)                           | 1,873 (18)                      | 2,235 (21)                           |
| 2015                                                      | 3,729 (31)                       | 5,667 (32)                           | 3,304 (31)                      | 3,343 (32)                           |
| 2016                                                      | 5,562 (47)                       | 6,628 (37)                           | 4,872 (46)                      | 4,050 (39)                           |
| <b>Comorbidities</b>                                      |                                  |                                      |                                 |                                      |
| Acute coronary syndrome                                   | 1,056 (9)                        | 1,429 (8)                            | 878 (8)                         | 889 (8)                              |
| Other ischemic heart disease                              | 2,071 (17)                       | 2,855 (16)                           | 1,729 (16)                      | 1,731 (16)                           |
| Heart failure/cardiomyopathy                              | 736 (6)                          | 1,253 (7)                            | 648 (6)                         | 679 (6)                              |
| Valve disorders                                           | 232 (2)                          | 346 (2)                              | 193 (2)                         | 196 (2)                              |
| Stroke                                                    | 460 (4)                          | 685 (4)                              | 390 (4)                         | 383 (4)                              |
| Other cerebrovascular disease                             | 525 (4)                          | 843 (5)                              | 461 (4)                         | 457 (4)                              |
| Atrial fibrillation                                       | 871 (7)                          | 1,356 (8)                            | 754 (7)                         | 762 (7)                              |
| Other arrhythmia                                          | 475 (4)                          | 690 (4)                              | 394 (4)                         | 403 (4)                              |
| Coronary revascularization in the past year               | 202 (2)                          | 232 (1)                              | 166 (2)                         | 159 (2)                              |
| Other cardiac surgery/invasive procedure in the past year | 87 (1)                           | 125 (1)                              | 71 (1)                          | 71 (1)                               |



|                                                                |            |             |            |            |
|----------------------------------------------------------------|------------|-------------|------------|------------|
| COPD                                                           | 317 (3)    | 641 (4)     | 297 (3)    | 284 (3)    |
| Other lung disease                                             | 815 (7)    | 1,577 (9)   | 766 (7)    | 762 (7)    |
| Venous thromboembolism                                         | 302 (3)    | 533 (3)     | 277 (3)    | 289 (3)    |
| Cancer (excluding non-melanoma skin cancer)                    | 829 (7)    | 1,276 (7)   | 716 (7)    | 756 (7)    |
| Liver disease                                                  | 259 (2)    | 408 (2)     | 226 (2)    | 236 (2)    |
| Rheumatic disease                                              | 326 (3)    | 585 (3)     | 306 (3)    | 290 (3)    |
| Psychiatric disorder                                           | 1,442 (12) | 2,678 (15)  | 1,339 (13) | 1,360 (13) |
| Fracture in the past year                                      | 211 (2)    | 324 (2)     | 183 (2)    | 186 (2)    |
| Acute pancreatitis                                             | 120 (1)    | 185 (1)     | 107 (1)    | 100 (1)    |
| Serious urinary tract infection                                | 250 (2)    | 482 (3)     | 228 (2)    | 215 (2)    |
| Lower limb amputation                                          | 13 (<1)    | 16 (<1)     | 12 (<1)    | 9 (<1)     |
| Arterial disease                                               | 544 (5)    | 858 (5)     | 473 (4)    | 486 (5)    |
| Renal disease                                                  | 377 (3)    | 1,038 (6)   | 369 (4)    | 388 (4)    |
| Obesity <sup>b</sup>                                           | 1,363 (11) | 3,709 (21)  | 1,354 (13) | 1,440 (14) |
| Diabetic eye complications                                     | 1,841 (15) | 3,349 (19)  | 1,687 (16) | 1,721 (16) |
| Diabetic ketoacidosis                                          | 11 (<1)    | 27 (<1)     | 10 (<1)    | 9 (<1)     |
| Diabetes, other complications                                  | 1,942 (16) | 3,968 (22)  | 1,810 (17) | 1,820 (17) |
| <b>Hospitalizations and outpatient visits in the past year</b> |            |             |            |            |
| Hospitalization due to cardiovascular causes                   | 465 (4)    | 712 (4)     | 402 (4)    | 394 (4)    |
| Hospitalization due to type 2 diabetes                         | 63 (1)     | 203 (1)     | 60 (1)     | 58 (1)     |
| Hospitalization due other causes                               | 1,177 (10) | 2,062 (12)  | 1,058 (10) | 1,073 (10) |
| Outpatient visit due to cardiovascular causes                  | 1,084 (9)  | 1,662 (9)   | 942 (9)    | 922 (9)    |
| Outpatient visit due to type 2 diabetes                        | 1,388 (12) | 3,188 (18)  | 1,334 (13) | 1,349 (13) |
| Outpatient visit due to other causes                           | 5,820 (49) | 9,601 (54)  | 5,239 (50) | 5,249 (50) |
| <b>Diabetes drugs in the past 6 months</b>                     |            |             |            |            |
| Metformin                                                      | 9,219 (78) | 12,815 (72) | 8,015 (76) | 8,042 (77) |
| Sulphonylureas                                                 | 2,691 (23) | 3,354 (19)  | 2,269 (22) | 2,280 (22) |
| DPP4 inhibitors                                                | 3,638 (31) | 4,228 (24)  | 2,985 (28) | 3,024 (29) |
| Insulin, fast-acting                                           | 2,282 (19) | 5,432 (31)  | 2,268 (22) | 2,304 (22) |
| Insulin, intermediate and long-acting                          | 3,928 (33) | 9,102 (51)  | 3,910 (37) | 3,892 (37) |
| Other antidiabetics (glitazones, glinides, acarbose)           | 745 (6)    | 883 (5)     | 591 (6)    | 599 (6)    |
| No diabetes drug                                               | 644 (5)    | 1,051 (6)   | 615 (6)    | 586 (6)    |
| <b>Time since first diabetes drug (years)</b>                  |            |             |            |            |
| <1                                                             | 947 (8)    | 1,464 (8)   | 854 (8)    | 826 (8)    |
| 1-2                                                            | 1,406 (12) | 1,892 (11)  | 1,252 (12) | 1,249 (12) |
| 3-4                                                            | 1,515 (13) | 2,166 (12)  | 1,384 (13) | 1,363 (13) |
| 5-6                                                            | 1,675 (14) | 2,334 (13)  | 1,469 (14) | 1,473 (14) |

|                                              |            |             |            |            |
|----------------------------------------------|------------|-------------|------------|------------|
| ≥7                                           | 6,348 (53) | 9,927 (56)  | 5,553 (53) | 5,601 (53) |
| <b>Other drugs in the past year</b>          |            |             |            |            |
| ARB/ACE-I                                    | 8,245 (69) | 12,502 (70) | 7,338 (70) | 7,354 (70) |
| Calcium-channel blocker                      | 3,945 (33) | 6,190 (35)  | 3,531 (34) | 3,525 (34) |
| Loop diuretic                                | 1,497 (13) | 3,091 (17)  | 1,394 (13) | 1,460 (14) |
| Other diuretic                               | 1,753 (15) | 2,989 (17)  | 1,614 (15) | 1,624 (15) |
| Beta-blocker                                 | 5,037 (42) | 7,453 (42)  | 4,404 (42) | 4,389 (42) |
| Digoxin                                      | 234 (2)    | 341 (2)     | 200 (2)    | 201 (2)    |
| Nitrate                                      | 1,127 (9)  | 1,476 (8)   | 932 (9)    | 932 (9)    |
| Platelet inhibitors                          | 4,219 (35) | 5,844 (33)  | 3,562 (34) | 3,563 (34) |
| Anticoagulant                                | 850 (7)    | 1,391 (8)   | 748 (7)    | 767 (7)    |
| Lipid lowering drug                          | 8,229 (69) | 12,257 (69) | 7,250 (69) | 7,199 (68) |
| Antidepressant                               | 1,915 (16) | 3,469 (20)  | 1,782 (17) | 1,816 (17) |
| Antipsychotic                                | 318 (3)    | 532 (3)     | 297 (3)    | 294 (3)    |
| Anxiolytic, hypnotic, or sedative            | 2,274 (19) | 3,566 (20)  | 2,018 (19) | 2,040 (19) |
| Beta-2 agonist inhalant                      | 1,034 (9)  | 1,945 (11)  | 965 (9)    | 960 (9)    |
| Anticholinergic inhalant                     | 311 (3)    | 546 (3)     | 285 (3)    | 281 (3)    |
| Glucocorticoid inhalant                      | 1,144 (10) | 2,052 (12)  | 1,060 (10) | 1,049 (10) |
| Oral glucocorticoid                          | 887 (7)    | 1,487 (8)   | 796 (8)    | 786 (7)    |
| NSAID                                        | 2,541 (21) | 3,953 (22)  | 2,284 (22) | 2,281 (22) |
| Opioid                                       | 1,995 (17) | 3,566 (20)  | 1,838 (17) | 1,833 (17) |
| <b>Number of drugs used in the past year</b> |            |             |            |            |
| 0-4                                          | 1,281 (11) | 1,427 (8)   | 1,072 (10) | 1,057 (10) |
| 5-9                                          | 4,575 (38) | 5,978 (34)  | 3,940 (37) | 3,979 (38) |
| 10-14                                        | 3,585 (30) | 5,569 (31)  | 3,217 (31) | 3,184 (30) |
| ≥15                                          | 2,450 (21) | 4,809 (27)  | 2,283 (22) | 2,292 (22) |

Abbreviations: ACE-I, angiotensin converting enzyme inhibitor; ARB, angiotensin receptor blocker; COPD, chronic obstructive pulmonary disease; DDP4, dipeptidyl peptidase 4; NSAID, non-steroidal anti-inflammatory drug; SD, standard deviation.

<sup>a</sup> Year of cohort entry was not included in propensity score.

<sup>b</sup> Diagnosis of obesity in secondary care.

**Supplementary Table 10:** Baseline characteristics of SGLT2 inhibitor users and GLP1-receptor-agonist users before and after propensity score matching in Denmark. Numbers are shown in n (%) unless otherwise indicated.

|                                                           | Before propensity-score-matching |                                     | After propensity-score-matching |                                     |
|-----------------------------------------------------------|----------------------------------|-------------------------------------|---------------------------------|-------------------------------------|
|                                                           | SGLT2 inhibitors<br>(N=9,117)    | GLP1-receptor-agonists<br>(N=9,495) | SGLT2 inhibitors<br>(N=6,701)   | GLP1-receptor-agonists<br>(N=6,701) |
| Male sex                                                  | 5,580 (61)                       | 5,425 (57)                          | 3,989 (60)                      | 3,969 (59)                          |
| Mean age (SD), yrs.                                       | 62 (11)                          | 60 (11)                             | 61 (11)                         | 61 (11)                             |
| <b>Place of birth</b>                                     |                                  |                                     |                                 |                                     |
| Scandinavia                                               | 7,514 (82)                       | 8,395 (88)                          | 5,815 (87)                      | 5,796 (86)                          |
| Rest of Europe                                            | 676 (7)                          | 527 (6)                             | 404 (6)                         | 428 (6)                             |
| Outside Europe                                            | 886 (10)                         | 537 (6)                             | 459 (7)                         | 452 (7)                             |
| Missing                                                   | 41 (<1)                          | 36 (<1)                             | 23 (<1)                         | 25 (<1)                             |
| <b>Civil status</b>                                       |                                  |                                     |                                 |                                     |
| Married/living with partner                               | 5,989 (66)                       | 6,135 (65)                          | 4,378 (65)                      | 4,388 (65)                          |
| Single                                                    | 3,095 (34)                       | 3,323 (35)                          | 2,297 (34)                      | 2,287 (34)                          |
| Missing                                                   | 33 (<1)                          | 37 (<1)                             | 26 (<1)                         | 26 (<1)                             |
| <b>Education</b>                                          |                                  |                                     |                                 |                                     |
| Primary-/secondary school/vocational training             | 7,241 (79)                       | 7,531 (79)                          | 5,328 (80)                      | 5,335 (80)                          |
| Short tertiary education                                  | 289 (3)                          | 296 (3)                             | 213 (3)                         | 204 (3)                             |
| Medium or long tertiary education                         | 1,211 (13)                       | 1,325 (14)                          | 906 (14)                        | 910 (14)                            |
| Missing                                                   | 376 (4)                          | 343 (4)                             | 254 (4)                         | 252 (4)                             |
| <b>Year of cohort entry<sup>a</sup></b>                   |                                  |                                     |                                 |                                     |
| 2013                                                      | 499 (5)                          | 1,260 (13)                          | 370 (6)                         | 862 (13)                            |
| 2014                                                      | 1,554 (17)                       | 2,531 (27)                          | 1,161 (17)                      | 1,774 (26)                          |
| 2015                                                      | 2,539 (28)                       | 2,877 (30)                          | 1,857 (28)                      | 2,044 (31)                          |
| 2016                                                      | 4,525 (50)                       | 2,827 (30)                          | 3,313 (49)                      | 2,021 (30)                          |
| <b>Comorbidities</b>                                      |                                  |                                     |                                 |                                     |
| Acute coronary syndrome                                   | 552 (6)                          | 641 (7)                             | 422 (6)                         | 427 (6)                             |
| Other ischemic heart disease                              | 1,397 (15)                       | 1,623 (17)                          | 1,057 (16)                      | 1,063 (16)                          |
| Heart failure/cardiomyopathy                              | 459 (5)                          | 628 (7)                             | 378 (6)                         | 379 (6)                             |
| Valve disorders                                           | 170 (2)                          | 217 (2)                             | 133 (2)                         | 136 (2)                             |
| Stroke                                                    | 376 (4)                          | 429 (5)                             | 289 (4)                         | 272 (4)                             |
| Other cerebrovascular disease                             | 393 (4)                          | 431 (5)                             | 296 (4)                         | 276 (4)                             |
| Atrial fibrillation                                       | 591 (6)                          | 687 (7)                             | 468 (7)                         | 445 (7)                             |
| Other arrhythmia                                          | 359 (4)                          | 419 (4)                             | 279 (4)                         | 284 (4)                             |
| Coronary revascularization in the past year               | 80 (1)                           | 102 (1)                             | 64 (1)                          | 60 (1)                              |
| Other cardiac surgery/invasive procedure in the past year | 20 (<1)                          | 26 (<1)                             | 15 (<1)                         | 14 (<1)                             |

|                                                                |            |            |            |            |
|----------------------------------------------------------------|------------|------------|------------|------------|
| COPD                                                           | 345 (4)    | 495 (5)    | 289 (4)    | 275 (4)    |
| Other lung disease                                             | 483 (5)    | 680 (7)    | 409 (6)    | 398 (6)    |
| Venous thromboembolism                                         | 193 (2)    | 276 (3)    | 163 (2)    | 156 (2)    |
| Cancer (excluding non-melanoma skin cancer)                    | 604 (7)    | 608 (6)    | 436 (7)    | 419 (6)    |
| Liver disease                                                  | 161 (2)    | 201 (2)    | 123 (2)    | 140 (2)    |
| Rheumatic disease                                              | 272 (3)    | 285 (3)    | 193 (3)    | 208 (3)    |
| Psychiatric disorder                                           | 472 (5)    | 601 (6)    | 366 (5)    | 369 (6)    |
| Fracture in the past year                                      | 115 (1)    | 125 (1)    | 84 (1)     | 82 (1)     |
| Acute pancreatitis                                             | 78 (1)     | 49 (1)     | 49 (1)     | 42 (1)     |
| Serious urinary tract infection                                | 155 (2)    | 234 (2)    | 133 (2)    | 126 (2)    |
| Lower limb amputation                                          | 21 (<1)    | 18 (<1)    | 15 (<1)    | 14 (<1)    |
| Arterial disease                                               | 700 (8)    | 904 (10)   | 562 (8)    | 563 (8)    |
| Renal disease                                                  | 378 (4)    | 688 (7)    | 339 (5)    | 347 (5)    |
| Obesity <sup>b</sup>                                           | 1,379 (15) | 2,488 (26) | 1,280 (19) | 1,286 (19) |
| Diabetic eye complications                                     | 764 (8)    | 1,054 (11) | 587 (9)    | 594 (9)    |
| Diabetic ketoacidosis                                          | 23 (<1)    | 41 (<1)    | 19 (<1)    | 21 (<1)    |
| Diabetes, other complications                                  | 1,835 (20) | 2,398 (25) | 1,442 (22) | 1,431 (21) |
| <b>Hospitalizations and outpatient visits in the past year</b> |            |            |            |            |
| Hospitalization due to cardiovascular causes                   | 344 (4)    | 448 (5)    | 280 (4)    | 278 (4)    |
| Hospitalization due to type 2 diabetes                         | 100 (1)    | 166 (2)    | 85 (1)     | 76 (1)     |
| Hospitalization due to other causes                            | 1,195 (13) | 1,534 (16) | 943 (14)   | 947 (14)   |
| Outpatient visit due to cardiovascular causes                  | 617 (7)    | 767 (8)    | 491 (7)    | 473 (7)    |
| Outpatient visit due to type 2 diabetes                        | 1,976 (22) | 3,047 (32) | 1,720 (26) | 1,755 (26) |
| Outpatient visit due to other causes                           | 5,038 (55) | 5,709 (60) | 3,852 (57) | 3,828 (57) |
| <b>Diabetes drugs in the past 6 months</b>                     |            |            |            |            |
| Metformin                                                      | 7,984 (88) | 7,975 (84) | 5,778 (86) | 5,788 (86) |
| Sulphonylureas                                                 | 2,266 (25) | 2,159 (23) | 1,668 (25) | 1,675 (25) |
| DPP4 inhibitors                                                | 4,677 (51) | 3,453 (36) | 2,963 (44) | 2,983 (45) |
| Insulin, fast-acting                                           | 514 (6)    | 1,392 (15) | 506 (8)    | 532 (8)    |
| Insulin, intermediate and long-acting                          | 1,177 (13) | 2,716 (29) | 1,153 (17) | 1,158 (17) |
| Other antidiabetics (glitazones, glinides, acarbose)           | 80 (1)     | 62 (1)     | 55 (1)     | 54 (1)     |
| No diabetes drug                                               | 394 (4)    | 471 (5)    | 327 (5)    | 319 (5)    |
| <b>Time since first diabetes drug (years)</b>                  |            |            |            |            |
| <1                                                             | 701 (8)    | 941 (10)   | 626 (9)    | 601 (9)    |
| 1-2                                                            | 1,057 (12) | 1,177 (12) | 865 (13)   | 825 (12)   |
| 3-4                                                            | 1,428 (16) | 1,433 (15) | 1,089 (16) | 1,085 (16) |
| 5-6                                                            | 1,498 (16) | 1,431 (15) | 1,060 (16) | 1,109 (17) |

|                                              |            |            |            |            |
|----------------------------------------------|------------|------------|------------|------------|
| ≥7                                           | 4,433 (49) | 4,513 (48) | 3,061 (46) | 3,081 (46) |
| <b>Other drugs in the past year</b>          |            |            |            |            |
| ARB/ACE-I                                    | 6,157 (68) | 6,557 (69) | 4,590 (68) | 4,590 (68) |
| Calcium-channel blocker                      | 2,784 (31) | 3,072 (32) | 2,088 (31) | 2,086 (31) |
| Loop diuretic                                | 966 (11)   | 1,631 (17) | 870 (13)   | 848 (13)   |
| Other diuretic                               | 1,805 (20) | 2,242 (24) | 1,444 (22) | 1,419 (21) |
| Beta-blocker                                 | 2,377 (26) | 2,743 (29) | 1,827 (27) | 1,835 (27) |
| Digoxin                                      | 220 (2)    | 278 (3)    | 181 (3)    | 176 (3)    |
| Nitrate                                      | 378 (4)    | 463 (5)    | 280 (4)    | 279 (4)    |
| Platelet inhibitors                          | 3,228 (35) | 3,509 (37) | 2,375 (35) | 2,401 (36) |
| Anticoagulant                                | 620 (7)    | 741 (8)    | 489 (7)    | 473 (7)    |
| Lipid lowering drug                          | 6,817 (75) | 7,117 (75) | 5,023 (75) | 5,062 (76) |
| Antidepressant                               | 1,224 (13) | 1,737 (18) | 1,059 (16) | 1,039 (16) |
| Antipsychotic                                | 383 (4)    | 457 (5)    | 312 (5)    | 290 (4)    |
| Anxiolytic, hypnotic, or sedative            | 880 (10)   | 1,052 (11) | 693 (10)   | 688 (10)   |
| Beta-2 agonist inhalant                      | 691 (8)    | 942 (10)   | 573 (9)    | 562 (8)    |
| Anticholinergic inhalant                     | 227 (2)    | 308 (3)    | 188 (3)    | 188 (3)    |
| Glucocorticoid inhalant                      | 675 (7)    | 912 (10)   | 558 (8)    | 553 (8)    |
| Oral glucocorticoid                          | 478 (5)    | 552 (6)    | 374 (6)    | 337 (5)    |
| NSAID                                        | 2,287 (25) | 2,591 (27) | 1,745 (26) | 1,775 (26) |
| Opioid                                       | 1,479 (16) | 1,818 (19) | 1,144 (17) | 1,156 (17) |
| <b>Number of drugs used in the past year</b> |            |            |            |            |
| 0-4                                          | 1,339 (15) | 1,088 (11) | 872 (13)   | 875 (13)   |
| 5-9                                          | 4,397 (48) | 4,068 (43) | 3,106 (46) | 3,117 (47) |
| 10-14                                        | 2,410 (26) | 2,791 (29) | 1,885 (28) | 1,906 (28) |
| ≥15                                          | 971 (11)   | 1,548 (16) | 838 (13)   | 803 (12)   |

Abbreviations: ACE-I, angiotensin converting enzyme inhibitor; ARB, angiotensin receptor blocker; COPD, chronic obstructive pulmonary disease; DDP4, dipeptidyl peptidase 4; NSAID, non-steroidal anti-inflammatory drug; SD, standard deviation.

<sup>a</sup> Year of cohort entry was not included in propensity score.

<sup>b</sup> Diagnosis of obesity in secondary care.

**Supplementary Table 11.** Median (interquartile range) follow-up time for primary outcomes and additional outcomes.

| Outcome                         | Median (interquartile range) follow-up time in days |                  |                        |
|---------------------------------|-----------------------------------------------------|------------------|------------------------|
|                                 | Total cohort                                        | SGLT2 inhibitors | GLP1-receptor-agonists |
| Lower limb amputation           | 274 (135-516)                                       | 237 (118-431)    | 319 (146-599)          |
| Bone fracture                   | 270 (132-508)                                       | 235 (118-426)    | 314 (144-591)          |
| Diabetic ketoacidosis           | 274 (135-517)                                       | 238 (118-431)    | 319 (147-599)          |
| Acute kidney injury             | 274 (135-516)                                       | 237 (118-431)    | 319 (146-598)          |
| Serious urinary tract infection | 272 (135-514)                                       | 237 (118-430)    | 318 (146-595)          |
| Venous thromboembolism          | 273 (135-514)                                       | 237 (118-430)    | 318 (146-597)          |
| Acute pancreatitis              | 274 (135-516)                                       | 237 (118-431)    | 319 (147-599)          |

The most common reason for censoring was end of study period (31-32% among SGLT2 inhibitor users and 30-31% among GLP1-receptor-agonist users).

**Supplementary Table 12:** Association between use of SGLT2 inhibitors vs. GLP1-receptor-agonists and risk of additional outcomes.

|                                               | <b>SGLT2 inhibitors</b><br>(n=17,213) |                                   | <b>GLP1-receptor-agonists</b><br>(n=17,213) |                                   | Hazard ratio<br>(95% CI) | Absolute risk<br>difference<br>(95% CI) <sup>a</sup> |
|-----------------------------------------------|---------------------------------------|-----------------------------------|---------------------------------------------|-----------------------------------|--------------------------|------------------------------------------------------|
|                                               | n events                              | n events per 1000<br>person-years | n events                                    | n events per 1000<br>person-years |                          |                                                      |
| Toe or metatarsal amputation                  | 26                                    | 1.7                               | 21                                          | 1.1                               | 1.55 (0.87-2.77)         | 0.6 (-0.1-1.9)                                       |
| Major osteoporotic bone fracture <sup>b</sup> | 93                                    | 6.2                               | 113                                         | 5.9                               | 1.05 (0.80-1.39)         | 0.3 (-1.2-2.3)                                       |

<sup>a</sup> n events per 1000 patient years. Calculated as (Hazard ratio-1) x rate of the comparator.

<sup>b</sup> Major osteoporotic fracture (hip, spine, proximal humerus or forearm) as defined in Supplementary Table 4.

**Supplemental Table 13** P-values for homogeneity of associations in subgroup analyses.

|                                 | Country | Sex  | Age  | CVD  | PAD/LLA | Insulin use |
|---------------------------------|---------|------|------|------|---------|-------------|
| Lower limb amputation           | 0.70    | 0.27 | 0.48 | 0.71 | 0.78    |             |
| Bone fracture                   | 0.51    | 0.47 | 0.65 | 0.35 |         |             |
| Diabetic ketoacidosis           | 0.80    | 0.23 | 0.19 | 0.74 |         | 0.65        |
| Acute kidney injury             | 0.46    | 0.99 | 0.70 | 0.19 |         |             |
| Serious urinary tract infection | 0.08    | 0.94 | 0.13 | 0.91 |         |             |
| Venous thromboembolism          | 0.95    | 0.31 | 0.21 | 0.85 |         |             |
| Acute pancreatitis              | 0.32    | 0.08 | 0.22 | 0.69 |         |             |

Subgroups were: country (Sweden/Denmark); sex (men/women); age (<65/≥65 years); history of cardiovascular disease (yes/no); history of peripheral artery disease or lower limb amputation (yes/no); insulin use at cohort entry (yes/no)  
 Abbreviations: CVD, cardiovascular disease; PAD, peripheral artery disease; LLA, lower limb amputation.



**Supplementary Table 14:** Association between use of SGLT2 inhibitors vs. GLP1-receptor-agonists and risk of diabetic ketoacidosis, and acute kidney injury in additional analyses with follow-up time limited to 6 months after treatment initiation.

|                       | <b>SGLT2 inhibitors</b><br>(n=17,213) |                                       | <b>GLP1-receptor-agonists</b><br>(n=17,213) |                                       | Hazard ratio<br>(95% CI) |
|-----------------------|---------------------------------------|---------------------------------------|---------------------------------------------|---------------------------------------|--------------------------|
|                       | n events                              | n events per<br>1000 person-<br>years | n events                                    | n events per<br>1000 person-<br>years |                          |
| Diabetic ketoacidosis | 12                                    | 1.7                                   | 5                                           | 0.7                                   | 2.50 (0.88-7.10)         |
| Acute kidney injury   | 21                                    | 3.0                                   | 24                                          | 3.3                                   | 0.93 (0.52-1.67)         |

**Supplementary Table 15:** Distribution of variables from the National Diabetes Register in Sweden among SGLT2 inhibitor users<sup>a</sup> and GLP1-receptor-agonist users, before and after propensity-score-matching. Numbers are shown in n (%).

|                                           | Before propensity-score matching |                                   | Propensity-score-matched cohort |                                   |
|-------------------------------------------|----------------------------------|-----------------------------------|---------------------------------|-----------------------------------|
|                                           | SGLT2 inhibitors (n=11,891)      | GLP1-receptor-agonists (n=17,783) | SGLT2 inhibitors (n=10,512)     | GLP1-receptor-agonists (n=10,512) |
| <b>HbA1c (%)</b>                          |                                  |                                   |                                 |                                   |
| ≤ 6.9                                     | 540 (5)                          | 893 (5)                           | 490 (5)                         | 505 (5)                           |
| 7.0-7.8                                   | 1,823 (15)                       | 2,306 (13)                        | 1,560 (15)                      | 1,490 (14)                        |
| 7.9-8.7                                   | 1,945 (16)                       | 2,913 (16)                        | 1,693 (16)                      | 1,770 (17)                        |
| 8.8-9.6                                   | 1,329 (11)                       | 2,223 (13)                        | 1,192 (11)                      | 1,291 (12)                        |
| ≥9.7                                      | 1,357 (11)                       | 2,421 (14)                        | 1,224 (12)                      | 1,348 (13)                        |
| Missing                                   | 4,897 (41)                       | 7,027 (40)                        | 4,353 (41)                      | 4,108 (39)                        |
| <b>Blood pressure (mmHg)</b>              |                                  |                                   |                                 |                                   |
| SBP < 140 and DBP < 90                    | 5,271 (44)                       | 7,882 (44)                        | 4,656 (44)                      | 4,643 (44)                        |
| SBP 140-159 OR DBP 90-99                  | 3,135 (26)                       | 4,931 (28)                        | 2,755 (26)                      | 2,950 (28)                        |
| SBP ≥160 OR DBP ≥100                      | 972 (8)                          | 1,477 (8)                         | 875 (8)                         | 883 (8)                           |
| Missing                                   | 2,513 (21)                       | 3,493 (20)                        | 2,226 (21)                      | 2,036 (19)                        |
| <b>Albuminuria</b>                        |                                  |                                   |                                 |                                   |
| Normalalbuminuria                         | 5,329 (45)                       | 7,917 (45)                        | 4,718 (45)                      | 4,719 (45)                        |
| Microalbuminuria                          | 1,502 (13)                       | 2,447 (14)                        | 1,327 (13)                      | 1,423 (14)                        |
| Macroalbuminuria                          | 393 (3)                          | 880 (5)                           | 358 (3)                         | 470 (4)                           |
| Missing                                   | 4,667 (39)                       | 6,539 (37)                        | 4,109 (39)                      | 3,900 (37)                        |
| <b>eGFR (ml/min)</b>                      |                                  |                                   |                                 |                                   |
| ≥90                                       | 4,175 (35)                       | 6,050 (34)                        | 3,721 (35)                      | 3,533 (34)                        |
| ≥60 to 89                                 | 3,826 (32)                       | 5,359 (30)                        | 3,366 (32)                      | 3,284 (31)                        |
| <60                                       | 772 (6)                          | 2,009 (11)                        | 683 (6)                         | 1,111 (11)                        |
| Missing                                   | 3,118 (26)                       | 4,365 (25)                        | 2,742 (26)                      | 2,584 (25)                        |
| <b>Body mass index (kg/m<sup>2</sup>)</b> |                                  |                                   |                                 |                                   |
| <25                                       | 683 (6)                          | 314 (2)                           | 550 (5)                         | 230 (2)                           |
| 25-29                                     | 2,875 (24)                       | 2,655 (15)                        | 2,450 (23)                      | 1,710 (16)                        |
| 30-34                                     | 3,010 (25)                       | 5,026 (28)                        | 2,700 (26)                      | 3,074 (29)                        |
| ≥35                                       | 2,063 (17)                       | 5,310 (30)                        | 1,946 (19)                      | 2,862 (27)                        |
| Missing                                   | 3,260 (27)                       | 4,478 (25)                        | 2,866 (27)                      | 2,636 (25)                        |
| <b>Current smoking</b>                    |                                  |                                   |                                 |                                   |
| No                                        | 7,145 (60)                       | 11,151 (63)                       | 6,348 (60)                      | 6,655 (63)                        |
| Yes                                       | 1,257 (11)                       | 1,845 (10)                        | 1,115 (11)                      | 1,063 (10)                        |
| Missing                                   | 3,489 (29)                       | 4,787 (27)                        | 3,049 (29)                      | 2,794 (27)                        |

Abbreviations: SBP, systolic blood pressure; DBP, diastolic blood pressure; eGFR, estimated glomerular filtration rate

<sup>a</sup> The propensity-score-matched cohort in Sweden, as presented in Supplementary Table 9. The variables in this table were adjusted for in the Cox regressions and were not used for propensity-score-matching.

**Supplementary Table 16** Hazard ratios (95% CI) for use of SGLT2 inhibitors vs GLP1-receptor-agonists for each imputation in the analysis in the propensity-score-matched cohort in Sweden, adjusting for glycated hemoglobin level, blood pressure, eGFR, albuminuria, body-mass index and smoking, using multiple imputation for missing values.<sup>8,9</sup>

| Imputation | Lower limb amputation | Bone fracture    | Diabetic ketoacidosis | Acute kidney injury | Serious urinary tract infection | Venous thromboembolism | Acute pancreatitis |
|------------|-----------------------|------------------|-----------------------|---------------------|---------------------------------|------------------------|--------------------|
| 1          | 2.86 (1.22-6.68)      | 1.10 (0.87-1.40) | 2.14 (0.79-5.78)      | 0.72 (0.44-1.18)    | 0.84 (0.57-1.23)                | 1.10 (0.72-1.70)       | 1.50 (0.71-3.20)   |
| 2          | 2.72 (1.16-6.40)      | 1.09 (0.85-1.38) | 2.11 (0.78-5.71)      | 0.70 (0.43-1.15)    | 0.81 (0.55-1.20)                | 1.09 (0.71-1.68)       | 1.49 (0.70-3.18)   |
| 3          | 2.76 (1.18-6.46)      | 1.10 (0.87-1.40) | 2.20 (0.81-5.98)      | 0.73 (0.44-1.19)    | 0.81 (0.55-1.19)                | 1.11 (0.72-1.70)       | 1.36 (0.64-2.90)   |
| 4          | 2.77 (1.19-6.48)      | 1.09 (0.86-1.38) | 2.04 (0.76-5.51)      | 0.71 (0.44-1.17)    | 0.82 (0.55-1.20)                | 1.11 (0.72-1.70)       | 1.41 (0.66-3.00)   |
| 5          | 2.83 (1.21-6.61)      | 1.10 (0.86-1.39) | 2.03 (0.75-5.49)      | 0.74 (0.45-1.20)    | 0.82 (0.56-1.22)                | 1.11 (0.72-1.72)       | 1.49 (0.70-3.18)   |
| 6          | 2.98 (1.28-6.98)      | 1.11 (0.88-1.41) | 2.18 (0.81-5.90)      | 0.73 (0.44-1.19)    | 0.80 (0.54-1.18)                | 1.13 (0.73-1.74)       | 1.53 (0.72-3.26)   |
| 7          | 2.80 (1.20-6.52)      | 1.09 (0.86-1.38) | 2.22 (0.82-6.00)      | 0.72 (0.44-1.17)    | 0.78 (0.53-1.16)                | 1.10 (0.71-1.69)       | 1.45 (0.68-3.09)   |
| 8          | 2.88 (1.23-6.74)      | 1.09 (0.86-1.39) | 2.24 (0.83-6.05)      | 0.73 (0.44-1.19)    | 0.83 (0.56-1.22)                | 1.15 (0.74-1.76)       | 1.52 (0.72-3.25)   |
| 9          | 2.65 (1.14-6.20)      | 1.09 (0.86-1.39) | 2.15 (0.79-5.82)      | 0.72 (0.44-1.18)    | 0.81 (0.55-1.20)                | 1.07 (0.69-1.64)       | 1.40 (0.66-2.97)   |
| 10         | 2.71 (1.16-6.32)      | 1.07 (0.84-1.35) | 2.01 (0.75-5.42)      | 0.73 (0.44-1.19)    | 0.80 (0.54-1.18)                | 1.12 (0.73-1.73)       | 1.51 (0.71-3.21)   |
| Combined   | 2.79 (1.19-6.55)      | 1.09 (0.86-1.39) | 2.13 (0.79-5.78)      | 0.72 (0.44-1.18)    | 0.81 (0.55-1.20)                | 1.11 (0.72-1.71)       | 1.47 (0.69-3.14)   |

**Supplementary Figure 1** Cumulative incidence of primary outcome serious adverse events.

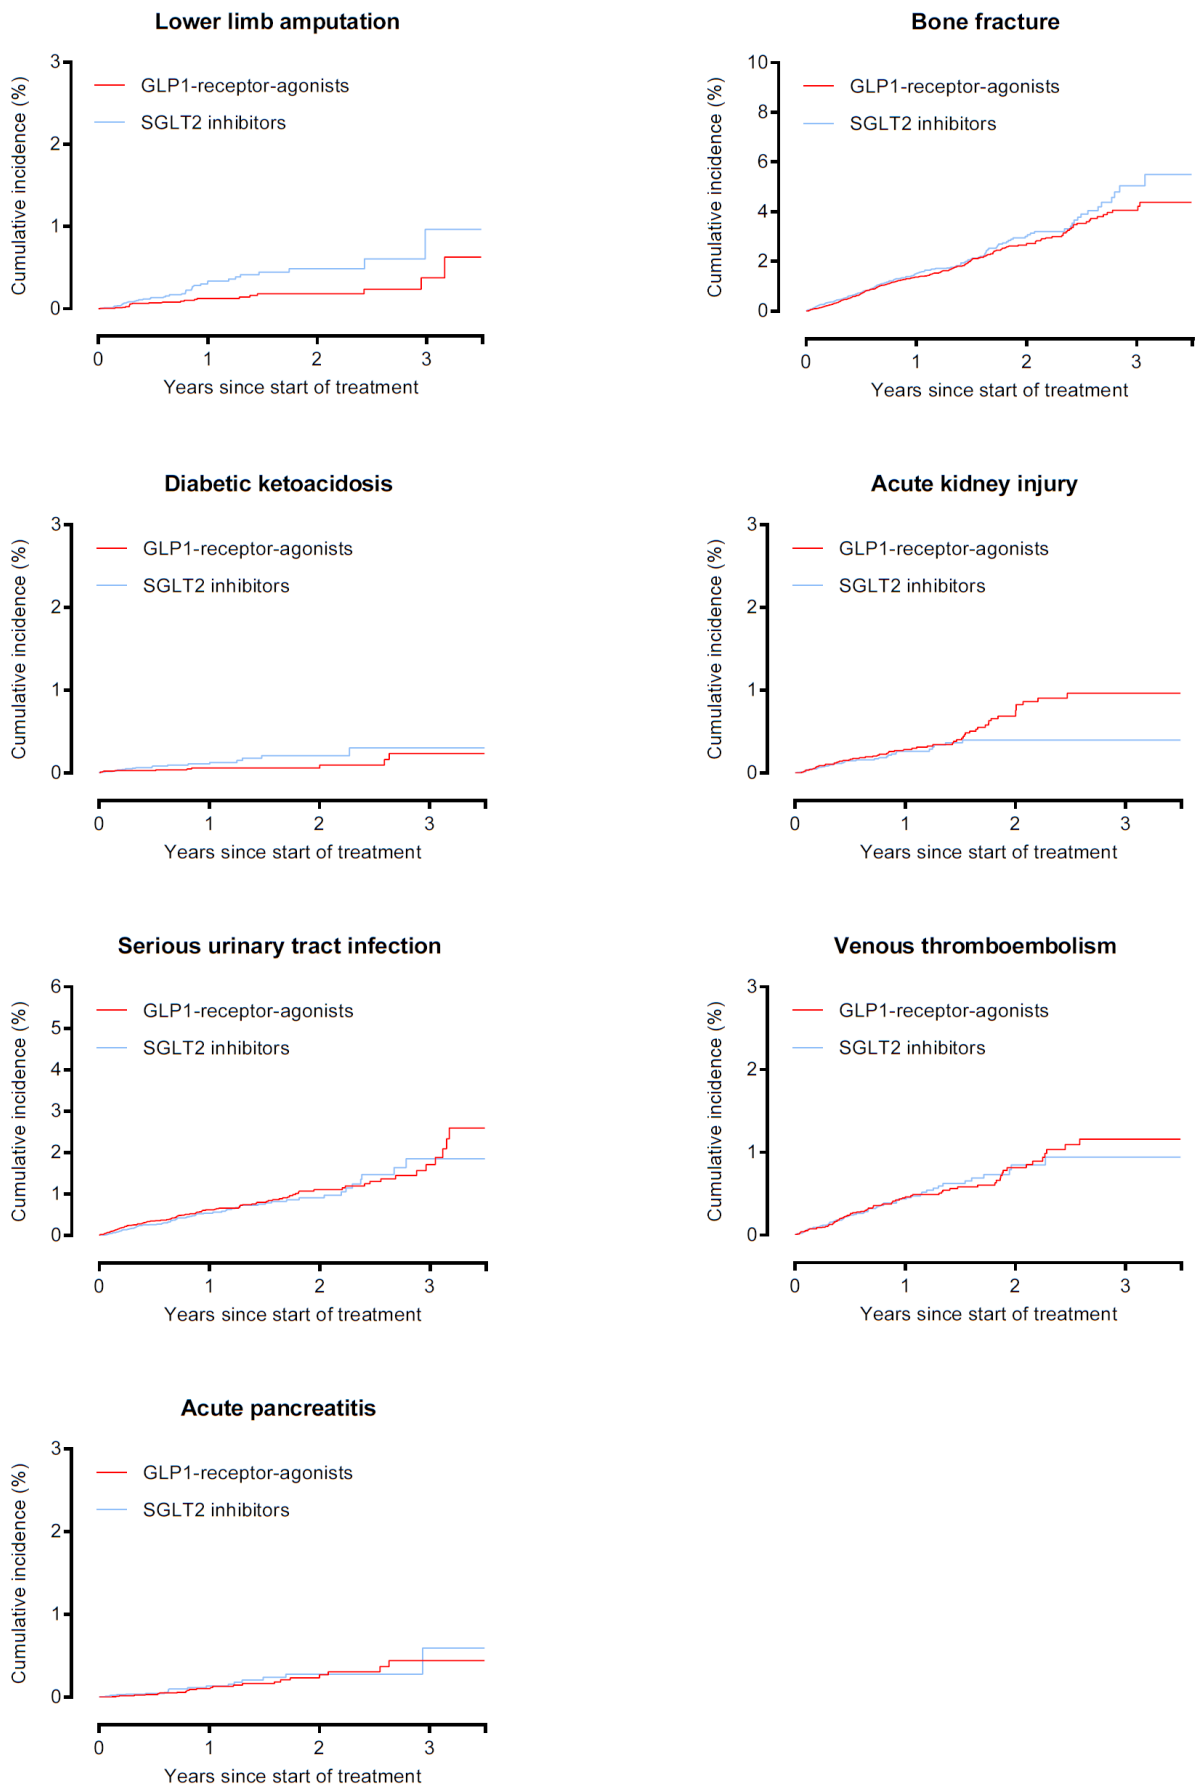

## References

1. Wettermark B, Hammar N, MichaelFored C, et al. The new Swedish Prescribed Drug Register—Opportunities for pharmacoepidemiological research and experience from the first six months. *Pharmacoepidemiol Drug Saf* 2007;16(7):726–35.
2. Pottegård A, Schmidt SAJ, Wallach-Kildemoes H, Sørensen HT, Hallas J, Schmidt M. Data Resource Profile: The Danish National Prescription Registry. *Int J Epidemiol* 2016;46(3):dyw213.
3. Ludvigsson JF, Andersson E, Ekbom A, et al. External review and validation of the Swedish national inpatient register. *BMC Public Health* 2011;11(1):450.
4. Schmidt M, Schmidt SAJ, Sandegaard JL, Ehrenstein V, Pedersen L, Sørensen HT. The Danish National Patient Registry: a review of content, data quality, and research potential. *Clin Epidemiol* 2015;7:449.
5. Ludvigsson JF, Almqvist C, Bonamy A-KE, et al. Registers of the Swedish total population and their use in medical research. *Eur J Epidemiol* 2016;31(2):125–36.
6. Schmidt M, Pedersen L, Sørensen HT. The Danish Civil Registration System as a tool in epidemiology. *Eur J Epidemiol* 2014;29(8):541–9.
7. Gudbjörnsdóttir S, Svensson A-M, Eliasson B, et al. National Diabetes Register. Annual Report 2016. 2017.
8. PROC MI: The MI Procedure : SAS/STAT(R) 9.2 User's Guide, Second Edition [Internet]. Available from: [https://support.sas.com/documentation/cdl/en/statug/63033/HTML/default/viewer.htm#mi\\_toc.htm](https://support.sas.com/documentation/cdl/en/statug/63033/HTML/default/viewer.htm#mi_toc.htm)
9. PROC MIANALYZE: The MIANALYZE Procedure : SAS/STAT(R) 9.2 User's Guide, Second Edition [Internet]. Available from: [https://support.sas.com/documentation/cdl/en/statug/63033/HTML/default/viewer.htm#mianalyze\\_toc.htm](https://support.sas.com/documentation/cdl/en/statug/63033/HTML/default/viewer.htm#mianalyze_toc.htm)
